# Supplementary material for: Nanoparticles modified bioceramic sealers on solubility, antimicrobial efficacy, pushout bond strength and marginal adaptation at apical-third of canal dentin
Source: PeerJ. 2025 Feb 10;13:e18840. doi: 10.7717/peerj.18840 (PMC11823649; doi:10.7717/peerj.18840)
Supplement: Data S1 [file peerj-13-18840-s001.xlsx]

## Sheet: data_table3
	Coronal				Middle				Apical
sr.no	group 1	group 2	group 3	group 4	group 1	group 2	group 3	group 4	group 1	group 2	group 3	group 4		*Experimental groups
1	7.4	9.47	9.53	9.75	7.11	9.36	9.49	9.61	6.59	7.22	7.29	7.33		Group 1: BC sealer
2	7.16	9.25	9.44	9.67	7.03	9.27	9.41	9.48	6.52	7.19	7.28	7.3		Group 2: AgNPs + BC sealer
3	7.31	9.21	9.46	9.71	7.01	9.31	9.38	9.41	6.44	7.18	7.21	7.32		Group 3: CHNPs + BC sealer
4	7.22	9.41	9.51	9.53	6.97	9.11	9.39	9.52	6.52	7.09	7.19	7.29		Group 4: HApNPs + BC sealer
5	7.21	9.47	9.5	9.61	6.91	9.18	9.44	9.57	6.41	WE	7.19	7.2
6	7.16	9.37	9.41	9.62	7.11	9.33	9.36	9.43	6.59	7.13	7.22	7.24
7	7.39	9.44	9.57	9.67	7.03	9.31	9.29	9.51	6.52	7.09	7.24	7.29
8	7.19	9.08	9.4	9.71	7.01	9.19	9.47	9.54	6.44	7.16	7.19	7.24
9	7.32	9.46	9.41	9.54	6.98	9.18	9.33	9.43	6.51	7.11	7.28	7.24
10	7.16	9.39	9.39	9.51	6.9	9.1	9.36	9.37	6.42	7.06	7.17	7.19

## Sheet: data_table2
	sr.no	Group 1: BC sealer	Group 2: AgNPs + BC sealer	Group 3: CHNPs + BC sealer	Group 4: HApNPs + BC sealer
	1	6.531	3.86	3.738	3.734
	2	6.213	3.952	3.891	3.902
	3	5.876	3.934	4.197	3.836
	4	6.103	3.947	4.221	4.034
	5	5.998	4.21	3.909	3.909
	6		3.873	4.003	3.986
	7		3.9	3.894	3.802
	8		4.148	4.233	3.897
	9		4.247	3.913	3.948
	10		3.863	3.879	3.794
